# Supplementary material for: High-throughput screening identification of a small-molecule compound that induces ferroptosis and attenuates the invasion and migration of hepatocellular carcinoma cells by targeting the STAT3/GPX4 axis
Source: PubMed Central journal article supplement — Int J Oncol. 2023 Feb 21;62(3):42. doi: 10.3892/ijo.2023.5490 (PMC9946807; doi:10.3892/ijo.2023.5490), 2023-02-21

Figure S1. (A) Viability of HCCLM3 cells treated with the 20 compounds (<30% cell viability). (B) The viability of Huh7 cells treated with these 20 compounds. (C and D) Wound healing assay. The HCCLM3 and Huh7 cells were pre-treated with PPVI or Static. PPVI, polyphyllin VI; STAT3, signal transducer and activator of transcription 3.

| A                   |  | HCCLM3         | B                   |  | Huh7           |
|---------------------|--|----------------|---------------------|--|----------------|
| Name                |  | Cell viability | Name                |  | Cell viability |
| Corypalmine         |  | 0.60%          | Bardoxolone methyl  |  | 1.50%          |
| cis-Aconitic acid   |  | 0.72%          | Polyphyllin VII     |  | 3.19%          |
| Loureirin A         |  | 0.72%          | Polyphyllin VI      |  | 7.25%          |
| Polyphyllin VI      |  | 3.54%          | $\beta$ -Lapachone  |  | 8.78%          |
| $\beta$ -Lapachone  |  | 4.29%          | Tomatine            |  | 9.88%          |
| Tomatine            |  | 5.15%          | Solamargine         |  | 17.52%         |
| Polyphyllin II      |  | 7.14%          | Gambogic Acid       |  | 18.23%         |
| Tubeimoside II      |  | 8.32%          | Betulin             |  | 25.31%         |
| Solamargine         |  | 9.21%          | Lapachol            |  | 53.60%         |
| Bardoxolone Methyl  |  | 10.69%         | Catharanthine       |  | 54.08%         |
| Polyphyllin VII     |  | 12.86%         | Nerolidol           |  | 56.72%         |
| Gambogic Acid       |  | 19.62%         | Tectoridin          |  | 61.36%         |
| Aristolochic acid A |  | 21.45%         | Tubeimoside II      |  | 71.92%         |
| Catharanthine       |  | 22.31%         | Polyphyllin II      |  | 73.56%         |
| Betulin             |  | 23.92%         | Aristolochic acid A |  | 90.46%         |
| Nerolidol           |  | 24.22%         | Corypalmine         |  | 94.21%         |
| Tectoridin          |  | 24.36%         | Ononin              |  | 98.28%         |
| Ononin              |  | 27.93%         | Angoroside C        |  | 100.78%        |
| Lapachol            |  | 30.86%         | cis-Aconitic acid   |  | 103.81%        |
| Angoroside C        |  | 31.41%         | Loureirin A         |  | 106.07%        |

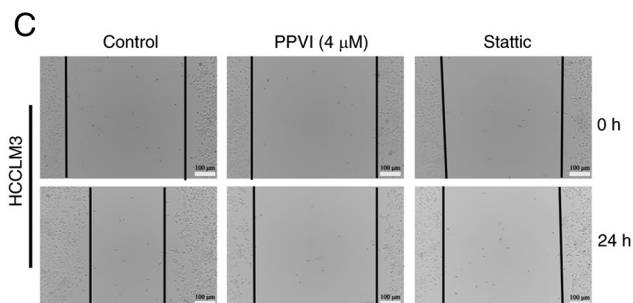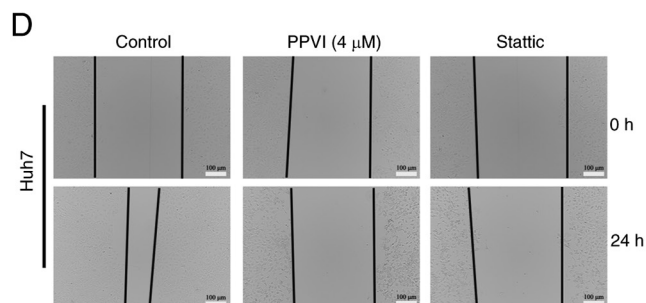

Figure S2. PPVI inhibits the STAT3/GPX4 axis in hepatocellular carcinoma cells. The HCCLM3 and Huh7 cells were pre-treated with PPVI or Stattic. (A) ROS levels in HCCLM3 and Huh7 cells were observed using DHE. (B) The Fe<sup>2+</sup> content in HCCLM3 and Huh7 cells was detected using a FerroOrange fluorescent probe. (C and D) MDA and GSH levels. (E and F) Protein expression of GPX4 in HCCLM3 and Huh7 cells was detected using immunofluorescence staining. \*P<0.05, \*\*P<0.01, \*\*\*P<0.001 and \*\*\*\*P<0.0001 vs. control or as indicated. NS, not significant; Con, control; PPVI, polyphyllin VI; STAT3, signal transducer and activator of transcription 3; GPX4, glutathione peroxidase 4; DHE, dihydroethidium; ROS, reactive oxygen species; GSH, glutathione; MDA, malondialdehyde.

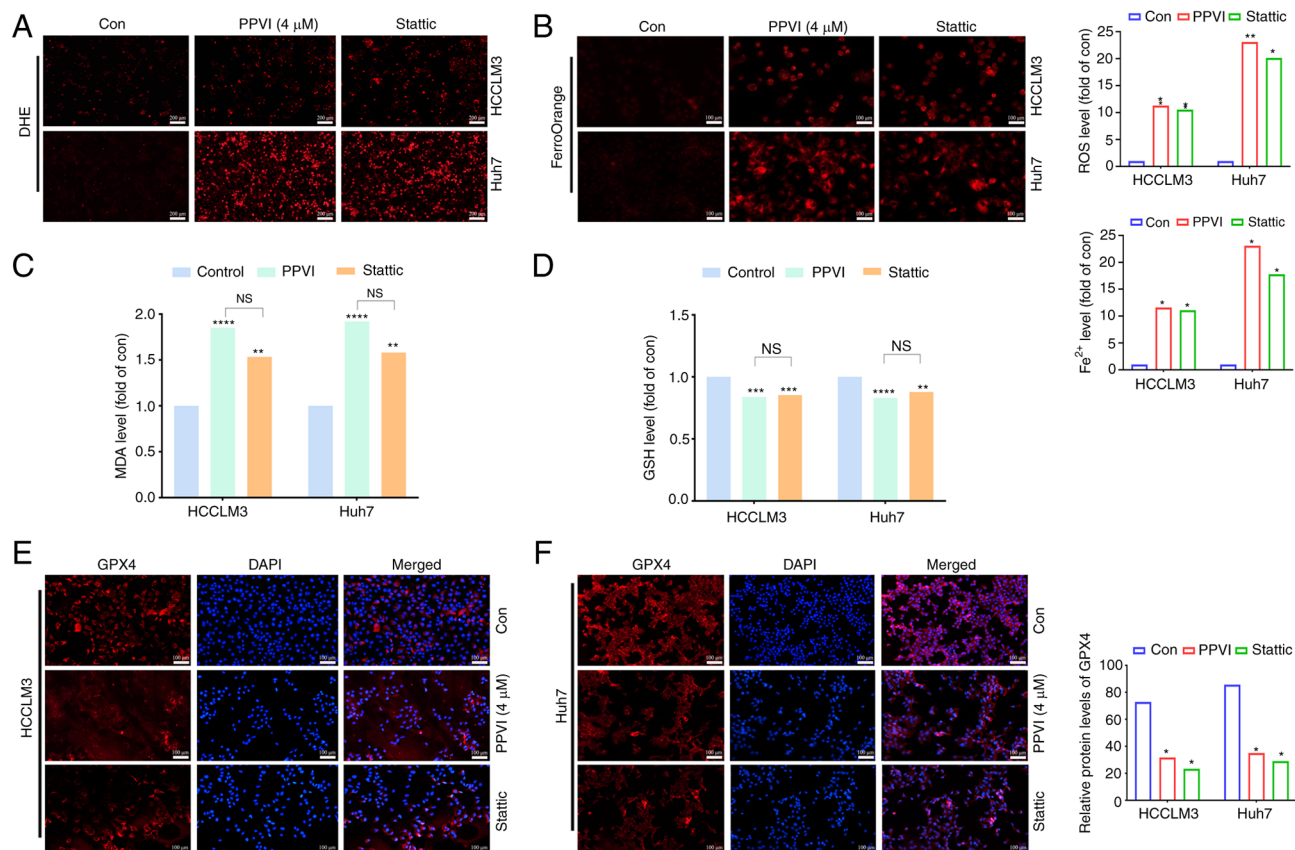

Supplement: Supplementary_Data.pdf [file Supplementary_Data.pdf]
